# Supplementary material
Source: publisher figshare collection journal article supplement (https://karger.figshare.com/articles/dataset/_/7252406)
Supplement: Supplementary file 1 [file 1]

Archive with 2 entries (2 files):
- 492960sm2.pdf
- 492960sm1.pdf
