# Supplementary material
Source: publisher figshare collection journal article supplement (https://karger.figshare.com/articles/dataset/_/7252406)
Supplement: Supplementary file 1 [file 1 › 492960sm2.pdf]

Supplementary table 1 Univariate analyses for acceptability, consideration and intention

| Acceptability                   |                               | b      | SE b  | p-value            | Non-linearity test (p) <sup>#</sup> |
|---------------------------------|-------------------------------|--------|-------|--------------------|-------------------------------------|
| Gender                          | Male                          | Ref    |       |                    |                                     |
|                                 | Female                        | 0.084  | 0.083 | 0.304              | N/A                                 |
| Age in years                    | Per 1 year increase           | -0.009 | 0.002 | 0.000*             | 0.203                               |
| Education                       | Low                           | Ref    |       |                    |                                     |
|                                 | Medium                        | 0.050  | 0.095 | 0.602              | N/A                                 |
|                                 | High                          | -0.155 | 0.110 | 0.158 <sup>s</sup> | N/A                                 |
| Having a partner                | Yes                           | -0.024 | 0.091 | 0.795              | N/A                                 |
|                                 | No                            | Ref    |       |                    |                                     |
| Being religious                 | Yes                           | -0.167 | 0.083 | 0.043*             | N/A                                 |
|                                 | No                            | Ref    |       |                    |                                     |
| Planning to have children       | Yes                           | 0.138  | 0.114 | 0.226              | N/A                                 |
|                                 | Maybe                         | 0.228  | 0.225 | 0.309              | N/A                                 |
|                                 | Don't know                    | 0.432  | 0.198 | 0.029*             | N/A                                 |
|                                 | No                            | Ref    |       |                    |                                     |
| Having biological children      | Yes                           | -0.125 | 0.084 | 0.138 <sup>s</sup> | N/A                                 |
|                                 | No                            | Ref    |       |                    |                                     |
| Having adopted or step children | Yes                           | -0.003 | 0.163 | 0.983              | N/A                                 |
|                                 | No                            | Ref    |       |                    |                                     |
| Genetic disease in the family   | Yes                           | 0.079  | 0.103 | 0.440              | N/A                                 |
|                                 | Don't know                    | 0.065  | 0.102 | 0.519              | N/A                                 |
|                                 | No                            | Ref    |       |                    |                                     |
| Having a chronic disease        | Yes                           | 0.066  | 0.085 | 0.438              | N/A                                 |
|                                 | No                            | Ref    |       |                    |                                     |
| Self-rated health               | Per 1 point increase in score | 0.032  | 0.047 | 0.497              | 0.013*                              |
| Self-rated health               | 1                             | 0.351  | 0.183 | 0.055 <sup>s</sup> |                                     |
|                                 | 2                             | 0.066  | 0.114 | 0.559              | N/A                                 |
|                                 | 3                             | Ref    |       |                    | N/A                                 |
|                                 | 4                             | 0.143  | 0.103 | 0.167 <sup>s</sup> | N/A                                 |
|                                 | 5                             | 0.642  | 0.230 | 0.005*             | N/A                                 |

| Awareness DTC-GT disease        | Yes                           | 0.048  | 0.091 | 0.596              | N/A                                 |
|---------------------------------|-------------------------------|--------|-------|--------------------|-------------------------------------|
|                                 | No                            | Ref    |       |                    |                                     |
| Awareness DTC-GT lifestyle      | Yes                           | -0.030 | 0.120 | 0.801              | N/A                                 |
|                                 | No                            | Ref    |       |                    |                                     |
| How-to knowledge                | Per 1 point increase in score | 0.010  | 0.026 | 0.696              | 0.240                               |
| Principles knowledge            | Per 1 point increase in score | -0.026 | 0.015 | 0.082 <sup>s</sup> | 0.784                               |
| Attitude                        | Per 1 point increase in score | 0.641  | 0.059 | 0.000*             | 0.350                               |
| Innovativeness                  | Per 1 point increase in score | 0.301  | 0.044 | 0.000*             | 0.313                               |
| Consideration                   |                               | b      | SE b  | p-value            | Non-linearity test (p) <sup>#</sup> |
| Gender                          | Male                          | Ref    |       |                    |                                     |
|                                 | Female                        | -0.006 | 0.075 | 0.938              | N/A                                 |
| Age in years                    | Per 1 year increase           | -0.010 | 0.002 | 0.000*             | 0.366                               |
| Education                       | Low                           | Ref    |       |                    |                                     |
|                                 | Medium                        | -0.016 | 0.087 | 0.854              | N/A                                 |
|                                 | High                          | -0.156 | 0.100 | 0.119 <sup>s</sup> | N/A                                 |
| Having a partner                | Yes                           | 0.008  | 0.083 | 0.922              | N/A                                 |
|                                 | No                            | Ref    |       |                    |                                     |
| Being religious                 | Yes                           | 0.039  | 0.075 | 0.605              | N/A                                 |
|                                 | No                            | Ref    |       |                    |                                     |
| Planning to have children       | Yes                           | 0.299  | 0.104 | 0.004*             | N/A                                 |
|                                 | Maybe                         | 0.231  | 0.204 | 0.257              | N/A                                 |
|                                 | Don't know                    | 0.301  | 0.179 | 0.093 <sup>s</sup> | N/A                                 |
|                                 | No                            | Ref    |       |                    |                                     |
| Having biological children      | Yes                           | -0.185 | 0.077 | 0.016*             | N/A                                 |
|                                 | No                            | Ref    |       |                    |                                     |
| Having adopted or step children | Yes                           | 0.053  | 0.148 | 0.722              | N/A                                 |
|                                 | No                            | Ref    |       |                    |                                     |
| Genetic disease in the family   | Yes                           | 0.345  | 0.093 | 0.000*             | N/A                                 |
|                                 | Don't know                    | 0.099  | 0.092 | 0.282              | N/A                                 |
|                                 | No                            | Ref    |       |                    |                                     |

| Having a chronic disease        | Yes                           | 0.105  | 0.078 | 0.177 <sup>s</sup> | N/A                                 |
|---------------------------------|-------------------------------|--------|-------|--------------------|-------------------------------------|
|                                 | No                            | Ref    |       |                    |                                     |
| Self-rated health               | Per 1 point increase in score | 0.113  | 0.043 | 0.009*             | 0.311                               |
| Awareness DTC-GT disease        | Yes                           | 0.070  | 0.083 | 0.394              | N/A                                 |
|                                 | No                            | Ref    |       |                    |                                     |
| Awareness DTC-GT lifestyle      | Yes                           | 0.132  | 0.109 | 0.226              | N/A                                 |
|                                 | No                            | Ref    |       |                    |                                     |
| How-to knowledge                | Per 1 point increase in score | -0.055 | 0.024 | 0.021*             | 0.505                               |
| Principles knowledge            | Per 1 point increase in score | 0.011  | 0.013 | 0.426              | 0.485                               |
| Attitude                        | Per 1 point increase in score | 0.843  | 0.049 | 0.000*             | 0.425                               |
| Innovativeness                  | Per 1 point increase in score | 0.566  | 0.036 | 0.000*             | 0.502                               |
| Intention                       |                               | b      | SE b  | p-value            | Non-linearity test (p) <sup>#</sup> |
| Gender                          | Male                          | Ref    |       |                    |                                     |
|                                 | Female                        | 0.024  | 0.068 | 0.719              | N/A                                 |
| Age in years                    | Per 1 year increase           | -0.005 | 0.002 | 0.017*             | 0.318                               |
| Education                       | Low                           | Ref    |       |                    |                                     |
|                                 | Medium                        | 0.003  | 0.078 | 0.966              | N/A                                 |
|                                 | High                          | -0.191 | 0.091 | 0.035*             | N/A                                 |
| Having a partner                | Yes                           | -0.048 | 0.075 | 0.527              | N/A                                 |
|                                 | No                            | Ref    |       |                    |                                     |
| Being religious                 | Yes                           | 0.0405 | 0.069 | 0.555              | N/A                                 |
|                                 | No                            | Ref    |       |                    |                                     |
| Planning to have children       | Yes                           | 0.048  | 0.095 | 0.609              | N/A                                 |
|                                 | Maybe                         | 0.173  | 0.186 | 0.352              | N/A                                 |
|                                 | Don't know                    | 0.084  | 0.164 | 0.607              | N/A                                 |
|                                 | No                            | Ref    |       |                    |                                     |
| Having biological children      | Yes                           | -0.114 | 0.070 | 0.101 <sup>s</sup> | N/A                                 |
|                                 | No                            | Ref    |       |                    |                                     |
| Having adopted or step children | Yes                           | -0.041 | 0.135 | 0.760              | N/A                                 |

|                               |                               |        |       |                     |       |
|-------------------------------|-------------------------------|--------|-------|---------------------|-------|
|                               | No                            | Ref    |       |                     |       |
| Genetic disease in the family | Yes                           | 0.150  | 0.085 | 0.077 <sup>\$</sup> | N/A   |
|                               | Don't know                    | 0.052  | 0.084 | 0.537               | N/A   |
|                               | No                            | Ref    |       |                     |       |
| Having a chronic disease      | Yes                           | 0.089  | 0.070 | 0.208               | N/A   |
|                               | No                            | Ref    |       |                     |       |
| Self-rated health             | Per 1 point increase in score | 0.127  | 0.039 | 0.001*              | 0.644 |
| Awareness DTC-GT disease      | Yes                           | -0.009 | 0.075 | 0.908               | N/A   |
|                               | No                            | Ref    |       |                     |       |
| Awareness DTC-GT lifestyle    | Yes                           | 0.045  | 0.099 | 0.649               | N/A   |
|                               | No                            | Ref    |       |                     |       |
| How-to knowledge              | Per 1 point increase in score | -0.090 | 0.021 | 0.000*              | 0.294 |
| Principles knowledge          | Per 1 point increase in score | -0.015 | 0.012 | 0.220               | 0.948 |
| Attitude                      | Per 1 point increase in score | 0.454  | 0.049 | 0.000*              | 0.364 |
| Innovativeness                | Per 1 point increase in score | 0.417  | 0.034 | 0.000*              | 0.371 |

---

Legend: \*  $\alpha < 0.05$ ; <sup>\$</sup>  $0.05 < \alpha < 0.20$ ; #If the linearity test was significant at  $\alpha < 0.05$ , an additional univariate analysis was done with the variable as categorical variable and was entered in the multivariate analyses as a categorical variable.
